# Supplementary material for: Epidemiologic Profile of Severe Acute Respiratory Infection in Brazil During the COVID-19 Pandemic: An Epidemiological Study
Source: PubMed Central journal article supplement (PMC9288583; doi:10.3389/fmicb.2022.911036), 2022-07-01
Supplement: Data_Sheet_1.pdf [file Data_Sheet_1.pdf]

## Supplement

**Title:** Epidemiologic profile of severe acute respiratory infection in Brazil during the COVID-19 pandemic

**Supplementary Table 1.** Place of notification of the hospitalized patients due to severe acute respiratory infection (SARI) in Brazil during the Coronavirus Disease (COVID)-19 pandemic regarding the SARI categories.

| State of notification | SARI due to Influenza virus | SARI due to other respiratory viruses <sup>†</sup> | SARI due to another known etiological agent | SARI due to an undefined etiological agent | SARI due to COVID-19 (SARS-CoV-2) | Total           |
|-----------------------|-----------------------------|----------------------------------------------------|---------------------------------------------|--------------------------------------------|-----------------------------------|-----------------|
| Acre                  | 12 (0.3%)                   | 0 (0.0%)                                           | 2 (0.0%)                                    | 2,098 (0.2%)                               | 4,528 (0.2%)                      | 6,640 (0.2%)    |
| Alagoas               | 15 (0.4%)                   | 12 (0.1%)                                          | 22 (0.3%)                                   | 10,791 (1.2%)                              | 20,928 (1.2%)                     | 31,768 (1.2%)   |
| Amazonas              | 23 (0.7%)                   | 477 (2.9%)                                         | 145 (2.1%)                                  | 11,029 (1.2%)                              | 38,957 (2.1%)                     | 50,631 (1.8%)   |
| Amapá                 | 9 (0.3%)                    | 12 (0.1%)                                          | 4 (0.1%)                                    | 586 (0.1%)                                 | 5,707 (0.3%)                      | 6,318 (0.2%)    |
| Bahia                 | 245 (7.1%)                  | 632 (3.8%)                                         | 439 (6.4%)                                  | 29,611 (3.3%)                              | 69,810 (3.8%)                     | 100,737 (3.7%)  |
| Ceará                 | 167 (4.8%)                  | 287 (1.7%)                                         | 113 (1.6%)                                  | 47,319 (5.3%)                              | 63,148 (3.5%)                     | 111,034 (4.1%)  |
| Federal District      | 47 (1.4%)                   | 1,256 (7.6%)                                       | 58 (0.8%)                                   | 13,210 (1.5%)                              | 43,019 (2.4%)                     | 57,590 (2.1%)   |
| Espírito Santo        | 38 (1.1%)                   | 100 (0.6%)                                         | 159 (2.3%)                                  | 7,528 (0.8%)                               | 14,564 (0.8%)                     | 22,389 (0.8%)   |
| Goiás                 | 66 (1.9%)                   | 486 (2.9%)                                         | 154 (2.2%)                                  | 19,413 (2.2%)                              | 70,522 (3.9%)                     | 90,641 (3.3%)   |
| Maranhão              | 447 (12.9%)                 | 31 (0.2%)                                          | 182 (2.7%)                                  | 12,201 (1.4%)                              | 20,963 (1.2%)                     | 33,824 (1.2%)   |
| Minas Gerais          | 289 (8.3%)                  | 605 (3.6%)                                         | 837 (12.2%)                                 | 119,181 (13.3%)                            | 177,613 (9.8%)                    | 298,525 (10.9%) |
| Mato Grosso do Sul    | 82 (2.4%)                   | 586 (3.5%)                                         | 112 (1.6%)                                  | 15,037 (1.7%)                              | 31,636 (1.7%)                     | 47,453 (1.7%)   |
| Mato Grosso           | 42 (1.2%)                   | 30 (0.2%)                                          | 58 (0.8%)                                   | 8,581 (1.0%)                               | 42,754 (2.4%)                     | 51,465 (1.9%)   |
| Pará                  | 86 (2.5%)                   | 102 (0.6%)                                         | 40 (0.6%)                                   | 21,290 (2.4%)                              | 46,436 (2.6%)                     | 67,954 (2.5%)   |
| Paraíba               | 48 (1.6%)                   | 7 (0.0%)                                           | 254 (3.7%)                                  | 15,299 (1.7%)                              | 27,642 (1.5%)                     | 43,250 (1.6%)   |
| Pernambuco            | 180 (5.2%)                  | 246 (1.5%)                                         | 42 (0.6%)                                   | 55,258 (6.2%)                              | 49,358 (2.7%)                     | 105,084 (3.8%)  |
| Piauí                 | 104 (3.0%)                  | 197 (1.2%)                                         | 39 (0.6%)                                   | 7,681 (0.9%)                               | 21,679 (1.2%)                     | 29,700 (1.1%)   |
| Paraná                | 105 (3.0%)                  | 3,923 (23.6%)                                      | 144 (2.1%)                                  | 70,353 (7.9%)                              | 118,535 (6.5%)                    | 193,060 (7.0%)  |
| Rio de Janeiro        | 187 (5.4%)                  | 816 (4.9%)                                         | 281 (4.1%)                                  | 72,446 (8.1%)                              | 173,093 (9.5%)                    | 246,823 (9.0%)  |
| Rio Grande do Norte   | 34 (1.0%)                   | 51 (0.3%)                                          | 155 (2.3%)                                  | 7,645 (0.9%)                               | 18,495 (1.0%)                     | 26,380 (1.0%)   |
| Rondônia              | 35 (1.0%)                   | 13 (0.1%)                                          | 180 (2.6%)                                  | 5,189 (0.6%)                               | 15,604 (0.9%)                     | 21,021 (0.8%)   |
| Roraima               | 9 (0.3%)                    | 18 (0.1%)                                          | 10 (0.1%)                                   | 659 (0.1%)                                 | 4,143 (0.2%)                      | 4,839 (0.2%)    |
| Rio Grande do Sul     | 48 (1.4%)                   | 1,236 (7.4%)                                       | 250 (3.6%)                                  | 36,153 (4.0%)                              | 110,762 (6.1%)                    | 148,449 (5.4%)  |
| Santa Catarina        | 38 (1.1%)                   | 695 (4.2%)                                         | 136 (2.0%)                                  | 22,212 (2.5%)                              | 72,569 (4.0%)                     | 95,650 (3.5%)   |
| Sergipe               | 32 (0.9%)                   | 57 (0.3%)                                          | 79 (1.2%)                                   | 8,208 (0.9%)                               | 18,493 (1.0%)                     | 26,869 (1.0%)   |
| São Paulo             | 1,065 (30.7%)               | 4,649 (28.0%)                                      | 2,933 (42.7%)                               | 267,536 (29.9%)                            | 526,184 (29.0%)                   | 802,367 (29.3%) |
| Tocantins             | 21 (0.6%)                   | 103 (0.6%)                                         | 38 (0.6%)                                   | 9,693 (1.1%)                               | 9,956 (0.5%)                      | 19,811 (0.7%)   |

  

| Individuals by place of notification per 1,000 inhabitants |                             |                                                    |                                             |                                            |                                   |       |
|------------------------------------------------------------|-----------------------------|----------------------------------------------------|---------------------------------------------|--------------------------------------------|-----------------------------------|-------|
| State of notification                                      | SARI due to Influenza virus | SARI due to other respiratory viruses <sup>†</sup> | SARI due to another known etiological agent | SARI due to an undefined etiological agent | SARI due to COVID-19 (SARS-CoV-2) | Total |
| Acre                                                       | 0.01                        | <0.01                                              | <0.01                                       | 2.38                                       | 5.13                              | 7.53  |
| Alagoas                                                    | <0.01                       | <0.01                                              | 0.01                                        | 3.23                                       | 6.27                              | 9.52  |
| Amazonas                                                   | 0.01                        | 0.12                                               | 0.03                                        | 2.66                                       | 9.40                              | 12.22 |
| Amapá                                                      | 0.01                        | 0.01                                               | <0.01                                       | 0.69                                       | 6.75                              | 7.47  |

|                     |       |       |       |      |       |       |
|---------------------|-------|-------|-------|------|-------|-------|
| Bahia               | 0.02  | 0.04  | 0.03  | 1.99 | 4.69  | 6.77  |
| Ceará               | 0.02  | 0.03  | 0.01  | 5.18 | 6.91  | 12.16 |
| Federal District    | 0.02  | 0.42  | 0.02  | 4.38 | 14.27 | 19.10 |
| Espírito Santo      | 0.01  | 0.02  | 0.04  | 1.87 | 3.62  | 5.57  |
| Goiás               | 0.01  | 0.07  | 0.02  | 2.77 | 10.05 | 12.91 |
| Maranhão            | 0.06  | <0.01 | 0.03  | 1.72 | 2.96  | 4.78  |
| Minas Gerais        | 0.01  | 0.03  | 0.04  | 5.63 | 8.39  | 14.10 |
| Mato Grosso do Sul  | 0.03  | 0.21  | 0.04  | 5.41 | 11.38 | 17.08 |
| Mato Grosso         | 0.01  | 0.01  | 0.02  | 2.46 | 12.27 | 14.77 |
| Pará                | 0.01  | 0.01  | <0.01 | 2.47 | 5.40  | 7.90  |
| Paraíba             | 0.01  | <0.01 | 0.06  | 3.81 | 6.88  | 10.76 |
| Pernambuco          | 0.02  | 0.03  | <0.01 | 5.78 | 5.16  | 11.00 |
| Piauí               | 0.03  | 0.06  | 0.01  | 2.35 | 6.62  | 9.07  |
| Paraná              | 0.01  | 0.34  | 0.01  | 6.15 | 10.37 | 16.88 |
| Rio de Janeiro      | 0.01  | 0.05  | 0.02  | 4.20 | 10.03 | 14.30 |
| Rio Grande do Norte | 0.01  | 0.01  | 0.04  | 2.18 | 5.27  | 7.52  |
| Rondônia            | 0.02  | 0.01  | 0.10  | 2.92 | 8.78  | 11.83 |
| Roraima             | 0.01  | 0.03  | 0.02  | 1.09 | 6.84  | 7.99  |
| Rio Grande do Sul   | <0.01 | 0.11  | 0.02  | 3.18 | 9.74  | 13.05 |
| Santa Catarina      | 0.01  | 0.10  | 0.02  | 3.10 | 10.13 | 13.35 |
| Sergipe             | 0.01  | 0.02  | 0.03  | 3.57 | 8.04  | 11.69 |
| São Paulo           | 0.02  | 0.10  | 0.06  | 5.83 | 11.46 | 17.47 |
| Tocantins           | 0.01  | 0.07  | 0.02  | 6.16 | 6.33  | 12.60 |

We presented the data as the number of individuals (N) and percentage (%).

**Supplementary Table 2.** Place of residence of the hospitalized patients due to severe acute respiratory infection (SARI) in Brazil during the Coronavirus Disease (COVID)-19 pandemic regarding the SARI classification

| Place of residence  | SARI due to Influenza virus | SARI due to other respiratory viruses' infection | SARI due to another known etiological agent | SARI due to an undefined etiological agent | SARI due to COVID-19 (SARS-CoV-2) | Total           |
|---------------------|-----------------------------|--------------------------------------------------|---------------------------------------------|--------------------------------------------|-----------------------------------|-----------------|
| Acre                | 12 (0.3%)                   | 0 (0.0%)                                         | 2 (0.0%)                                    | 2,095 (0.2%)                               | 4,529 (0.2%)                      | 6,638 (0.2%)    |
| Alagoas             | 16 (0.5%)                   | 12 (0.1%)                                        | 22 (0.3%)                                   | 10,873 (1.2%)                              | 21,055 (1.2%)                     | 31,978 (1.2%)   |
| Amazonas            | 24 (0.7%)                   | 481 (2.9%)                                       | 148 (2.2%)                                  | 11,209 (1.3%)                              | 39,861 (2.2%)                     | 51,723 (1.9%)   |
| Amapá               | 9 (0.3%)                    | 12 (0.1%)                                        | 5 (0.1%)                                    | 602 (0.1%)                                 | 5,556 (0.3%)                      | 6,184 (0.2%)    |
| Bahia               | 244 (7.0%)                  | 636 (3.8%)                                       | 439 (6.4%)                                  | 29,878 (3.3%)                              | 70,075 (3.9%)                     | 101,272 (3.7%)  |
| Ceará               | 170 (4.9%)                  | 288 (1.7%)                                       | 111 (1.6%)                                  | 47,199 (5.3%)                              | 63,095 (3.5%)                     | 110,863 (4.0%)  |
| Federal District    | 45 (1.3%)                   | 1,012 (6.1%)                                     | 47 (0.7%)                                   | 11,805 (1.3%)                              | 39,597 (2.2%)                     | 52,506 (1.9%)   |
| Espírito Santo      | 40 (1.2%)                   | 99 (0.6%)                                        | 158 (2.3%)                                  | 7,584 (0.8%)                               | 14,648 (0.8%)                     | 22,529 (0.8%)   |
| Goiás               | 71 (2.0%)                   | 723 (4.4%)                                       | 163 (2.4%)                                  | 20,761 (2.3%)                              | 73,061 (4.0%)                     | 94,779 (3.5%)   |
| Maranhão            | 449 (13.0%)                 | 45 (0.3%)                                        | 185 (2.7%)                                  | 12,579 (1.4%)                              | 21,840 (1.2%)                     | 35,098 (1.3%)   |
| Minas Gerais        | 290 (8.4%)                  | 627 (3.8%)                                       | 841 (12.3%)                                 | 119,273 (13.3%)                            | 178,426 (9.8%)                    | 299,457 (10.9%) |
| Mato Grosso do Sul  | 82 (2.4%)                   | 587 (3.5%)                                       | 113 (1.6%)                                  | 15,128 (1.7%)                              | 31,962 (1.8%)                     | 47,872 (1.7%)   |
| Mato Grosso         | 44 (1.3%)                   | 36 (0.2%)                                        | 60 (0.9%)                                   | 8,692 (1.0%)                               | 43,193 (2.4%)                     | 52,025 (1.9%)   |
| Pará                | 87 (2.5%)                   | 104 (0.6%)                                       | 38 (0.6%)                                   | 21,547 (2.4%)                              | 47,250 (2.6%)                     | 69,026 (2.5%)   |
| Paraíba             | 49 (1.4%)                   | 8 (0.0%)                                         | 255 (3.7%)                                  | 15,336 (1.7%)                              | 27,616 (1.5%)                     | 43,264 (1.6%)   |
| Pernambuco          | 177 (5.1%)                  | 248 (1.5%)                                       | 43 (0.6%)                                   | 54,932 (6.1%)                              | 49,346 (2.7%)                     | 104,746 (3.8%)  |
| Piauí               | 99 (2.9%)                   | 183 (1.1%)                                       | 39 (0.6%)                                   | 7,352 (0.8%)                               | 20,936 (1.2%)                     | 28,609 (1.0%)   |
| Paraná              | 101 (2.9%)                  | 3,898 (23.5%)                                    | 142 (2.1%)                                  | 70,043 (7.8%)                              | 118,600 (6.5%)                    | 192,784 (7.0%)  |
| Rio de Janeiro      | 188 (5.4%)                  | 815 (4.9%)                                       | 286 (4.2%)                                  | 72,561 (8.1%)                              | 173,251 (9.5%)                    | 247,101 (9.0%)  |
| Rio Grande do Norte | 33 (1.0%)                   | 52 (0.3%)                                        | 153 (2.2%)                                  | 7,697 (0.9%)                               | 18,489 (1.0%)                     | 26,424 (1.0%)   |
| Rondônia            | 36 (1.0%)                   | 14 (0.1%)                                        | 176 (2.6%)                                  | 5,184 (0.6%)                               | 15,891 (0.9%)                     | 21,301 (0.8%)   |
| Roraima             | 9 (0.3%)                    | 19 (0.1%)                                        | 9 (0.1%)                                    | 693 (0.1%)                                 | 4,197 (0.2%)                      | 4,927 (0.2%)    |
| Rio Grande do Sul   | 48 (1.4%)                   | 1,239 (7.5%)                                     | 252 (3.7%)                                  | 36,235 (4.0%)                              | 110,974 (6.1%)                    | 148,748 (5.4%)  |
| Santa Catarina      | 35 (1.0%)                   | 704 (4.2%)                                       | 135 (2.0%)                                  | 22,338 (2.5%)                              | 72,328 (4.0%)                     | 95,540 (3.5%)   |
| Sergipe             | 31(0.9%)                    | 59 (0.4%)                                        | 78 (1.1%)                                   | 8,104 (0.9%)                               | 18,283 (1.0%)                     | 26,555 (1.0%)   |
| São Paulo           | 1,057 (30.5%)               | 4,616 (27.8%)                                    | 2,925 (42.6%)                               | 266,943 (29.8%)                            | 522,841(28.8%)                    | 798,382 (29.1%) |
| Tocantins           | 19 (0.5%)                   | 101 (0.6%)                                       | 39 (0.6%)                                   | 9,479 (1.1%)                               | 9,960 (0.5%)                      | 19,598 (0.7%)   |

**Individuals by place of notification per 1,000 inhabitants**

| State of notification | SARI due to Influenza virus | SARI due to other respiratory viruses' infection | SARI due to another known etiological agent | SARI due to an undefined etiological agent | SARI due to COVID-19 (SARS-CoV-2) | Total |
|-----------------------|-----------------------------|--------------------------------------------------|---------------------------------------------|--------------------------------------------|-----------------------------------|-------|
| Acre                  | 0.01                        | <0.01                                            | <0.01                                       | 2.38                                       | 5.14                              | 7.53  |

|                     |       |       |       |      |       |       |
|---------------------|-------|-------|-------|------|-------|-------|
| Alagoas             | <0.01 | <0.01 | 0.01  | 3.26 | 6.31  | 9.58  |
| Amazonas            | 0.01  | 0.12  | 0.04  | 2.70 | 9.62  | 12.48 |
| Amapá               | 0.01  | 0.01  | 0.01  | 0.71 | 6.57  | 7.31  |
| Bahia               | 0.02  | 0.04  | 0.03  | 2.01 | 4.71  | 6.81  |
| Ceará               | 0.02  | 0.03  | 0.01  | 5.17 | 6.91  | 12.14 |
| Federal District    | 0.01  | 0.34  | 0.02  | 3.92 | 13.13 | 17.41 |
| Espírito Santo      | 0.01  | 0.02  | 0.04  | 1.89 | 3.65  | 5.61  |
| Goiás               | 0.01  | 0.10  | 0.02  | 2.96 | 10.41 | 13.50 |
| Maranhão            | 0.06  | 0.01  | 0.03  | 1.78 | 3.09  | 4.96  |
| Minas Gerais        | 0.01  | 0.03  | 0.04  | 5.63 | 8.43  | 14.15 |
| Mato Grosso do Sul  | 0.03  | 0.21  | 0.04  | 5.44 | 11.50 | 17.23 |
| Mato Grosso         | 0.01  | 0.01  | 0.02  | 2.49 | 12.40 | 14.93 |
| Pará                | 0.01  | 0.01  | <0.01 | 2.50 | 5.49  | 8.02  |
| Paraíba             | 0.01  | <0.01 | 0.06  | 3.82 | 6.87  | 10.77 |
| Pernambuco          | 0.02  | 0.03  | <0.01 | 5.75 | 5.16  | 10.96 |
| Piauí               | 0.03  | 0.06  | 0.01  | 2.25 | 6.40  | 8.74  |
| Paraná              | 0.01  | 0.34  | 0.01  | 6.13 | 10.37 | 16.86 |
| Rio de Janeiro      | 0.01  | 0.05  | 0.02  | 4.20 | 10.03 | 14.31 |
| Rio Grande do Norte | 0.01  | 0.01  | 0.04  | 2.19 | 5.27  | 7.53  |
| Rondônia            | 0.02  | 0.01  | 0.10  | 2.92 | 8.94  | 11.99 |
| Roraima             | 0.01  | 0.03  | 0.01  | 1.14 | 6.93  | 8.13  |
| Rio Grande do Sul   | <0.01 | 0.11  | 0.02  | 3.18 | 9.75  | 13.07 |
| Santa Catarina      | <0.01 | 0.10  | 0.02  | 3.12 | 10.09 | 13.33 |
| Sergipe             | 0.01  | 0.03  | 0.03  | 3.53 | 7.95  | 11.55 |
| São Paulo           | 0.02  | 0.10  | 0.06  | 5.81 | 11.39 | 17.39 |
| Tocantins           | 0.01  | 0.06  | 0.02  | 6.03 | 6.33  | 12.46 |

We presented the data as the number of individuals (N) and percentage (%).

**Supplementary Table 3.** Odds ratio (OR) for the association between the severe acute respiratory infection (SARI) categories and the features of the hospitalized patients due to SARI in Brazil during the Coronavirus Disease (COVID)-19 pandemic.

| Patient's features                              | Category                                  | OR (95%CI)                                              | OR (95%CI)                                                         |
|-------------------------------------------------|-------------------------------------------|---------------------------------------------------------|--------------------------------------------------------------------|
|                                                 |                                           | SARI due to an undefined etiological agent vs. COVID-19 | SARI due to an undefined etiological agent vs. others <sup>a</sup> |
| Sex                                             | Female                                    | 1.153 (1.147 to 1.159)                                  | 1.152 (1.146 to 1.158)                                             |
|                                                 | Male                                      | Reference                                               | Reference                                                          |
| Age                                             | <1 y.o.                                   | 15.100 (14.760 to 15.460)                               | 8.028 (7.882 to 8.176)                                             |
|                                                 | 1-12 y.o.                                 | 17.660 (17.350 to 17.970)                               | 12.090 (11.910 to 12.280)                                          |
|                                                 | 13-24 y.o.                                | 3.201 (3.153 to 3.249)                                  | 3.122 (3.076 to 3.169)                                             |
|                                                 | 25-60 y.o.                                | Reference                                               | Reference                                                          |
|                                                 | 61-72 y.o.                                | 1.179 (1.170 to 1.187)                                  | 1.178 (1.170 to 1.187)                                             |
|                                                 | 73-85 y.o.                                | 1.587 (1.575 to 1.599)                                  | 1.583 (1.572 to 1.595)                                             |
|                                                 | +85 y.o.                                  | 2.104 (2.083 to 2.125)                                  | 2.092 (2.072 to 2.113)                                             |
| Race                                            | White                                     | Reference                                               | Reference                                                          |
|                                                 | Black                                     | 1.311 (1.285 to 1.327)                                  | 1.313 (1.297 to 1.329)                                             |
|                                                 | Asian                                     | 1.081 (1.053 to 1.110)                                  | 1.087 (1.059 to 1.116)                                             |
|                                                 | Individuals from a multiracial background | 1.214 (1.207 to 1.221)                                  | 1.214 (1.207 to 1.222)                                             |
|                                                 | Indigenous peoples                        | 1.210 (1.145 to 1.280)                                  | 1.198 (1.133 to 1.266)                                             |
| Educational level                               | Illiterate                                | 3.468 (3.400 to 3.537)                                  | 3.323 (3.258 to 3.389)                                             |
|                                                 | 1 <sup>st</sup> fundamental cycle         | 2.035 (2.003 to 2.068)                                  | 2.023 (1.991 to 2.056)                                             |
|                                                 | 2 <sup>nd</sup> fundamental cycle         | 1.571 (1.544 to 1.599)                                  | 1.564 (1.537 to 1.591)                                             |
|                                                 | High school                               | 1.244 (1.224 to 1.264)                                  | 1.244 (1.224 to 1.264)                                             |
|                                                 | University education                      | Reference                                               | Reference                                                          |
|                                                 | Not applicable                            | -                                                       | -                                                                  |
| Place of residence                              | Urban                                     | Reference                                               | Reference                                                          |
|                                                 | Rural                                     | 1.228 (1.214 to 1.243)                                  | 1.227 (1.213 to 1.241)                                             |
|                                                 | Peri-urban                                | 1.420 (1.362 to 1.479)                                  | 1.307 (1.256 to 1.361)                                             |
| Living in a Flu outbreak region                 | Yes                                       | 0.772 (0.765 to 0.779)                                  | 0.779 (0.772 to 0.786)                                             |
|                                                 | No                                        | Reference                                               | Reference                                                          |
| Received Flu vaccine                            | Yes                                       | 1.285 (1.263 to 1.297)                                  | 1.284 (1.273 to 1.296)                                             |
|                                                 | No                                        | Reference                                               | Reference                                                          |
| Used antiviral drug to treat the clinical signs | Yes                                       | 1.462 (1.449 to 1.475)                                  | 1.440 (1.258 to 1.272)                                             |
|                                                 | No                                        | Reference                                               | Reference                                                          |
| Intensive care unit                             | Yes                                       | 0.650 (0.646 to 0.654)                                  | 0.654 (0.650 to 0.658)                                             |
|                                                 | No                                        | Reference                                               | Reference                                                          |
| Mechanical ventilatory support                  | Invasive                                  | 0.392 (0.388 to 0.395)                                  | 0.398 (0.394 to 0.401)                                             |
|                                                 | Non-invasive                              | 0.528 (0.524 to 0.531)                                  | 0.533 (0.529 to 0.536)                                             |
|                                                 | Not required                              | Reference                                               | Reference                                                          |
| Closure criterion                               | Laboratorial criterion                    | Reference                                               | Reference                                                          |
|                                                 | Clinical - Epidemiological                | 1.831 (1.790 to 1.873)                                  | 1.835 (1.794 to 1.876)                                             |
|                                                 | Clinical                                  | 3.520 (3.475 to 3.565)                                  | 3.504 (3.460 to 3.549)                                             |
|                                                 | Clinical - Image exams                    | 0.143 (0.139 to 0.147)                                  | 0.145 (0.141 to 0.149)                                             |
| Outcome                                         | Cure                                      | Reference                                               | Reference                                                          |
|                                                 | Death                                     | 0.487 (0.484 to 0.491)                                  | 0.495 (0.491 to 0.498)                                             |
|                                                 | Death not related to SARI                 | 14.790 (14.300 to 15.300)                               | 12.580 (12.190 to 12.980)                                          |
| Received SARS-CoV-2 vaccines                    | Yes                                       | 1.388 (1.372 to 1.403)                                  | 1.403 (1.388 to 1.419)                                             |
|                                                 | No                                        | Reference                                               | Reference                                                          |

<sup>a</sup>, others included SARI due to Influenza, SARI due to another respiratory viruses' infection, SARI due to another known etiological agent, and SARI due to COVID-19 (SARS-CoV-2).

We presented the data as the number of individuals (N) and percentage (%).

We performed the statistical analyses using the chi-square test. We adopted an alpha error of 0.05.

95%CI, 95% confidence interval; SARS-CoV-2, Severe Acute Respiratory Syndrome Coronavirus 2; y.o., years old.

**Supplementary Table 4.** Multivariate analysis using the binary logistic regression compares patients with severe acute respiratory infection (SARI) due to an undefined etiological agent versus patients with Coronavirus Disease (COVID)-19.

**Model 1.** Included social and demographic data as well as hospitalization information <sup>a</sup>

| Patient's features                        | B      | SE    | Wald      | df | P      | OR     | 95%CI for OR |        |
|-------------------------------------------|--------|-------|-----------|----|--------|--------|--------------|--------|
|                                           |        |       |           |    |        |        | Lower        | Upper  |
| Sex (female)                              | 0.109  | 0.011 | 106.752   | 1  | <0.001 | 1.116  | 1.093        | 1.139  |
| Age                                       |        |       |           |    |        |        |              |        |
| <1 y.o.                                   | 2.022  | 0.072 | 779.967   | 1  | <0.001 | 7.556  | 6.557        | 8.709  |
| 1-12 y.o.                                 | 2.214  | 0.041 | 2,907.583 | 1  | <0.001 | 9.156  | 8.448        | 9.923  |
| 13-24 y.o.                                | 1.273  | 0.028 | 2,036.079 | 1  | <0.001 | 3.571  | 3.379        | 3.774  |
| 25-60 y.o.                                |        |       | 5,743.692 | 6  | <0.001 |        |              |        |
| 61-72 y.o.                                | 0.025  | 0.015 | 2.919     | 1  | 0.088  | 1.025  | 0.996        | 1.055  |
| 73-85 y.o.                                | 0.363  | 0.016 | 493.049   | 1  | <0.001 | 1.438  | 1.392        | 1.485  |
| +85 y.o.                                  | 0.737  | 0.022 | 1,114.412 | 1  | <0.001 | 2.091  | 2.002        | 2.183  |
| Race                                      |        |       |           |    |        |        |              |        |
| White                                     |        |       | 261.985   | 4  | <0.001 |        |              |        |
| Black                                     | 0.202  | 0.022 | 82.044    | 1  | <0.001 | 1.224  | 1.172        | 1.279  |
| Asian                                     | 0.007  | 0.053 | 0.020     | 1  | 0.888  | 1.008  | 0.908        | 1.118  |
| Individuals from a multiracial background | -0.063 | 0.012 | 28.835    | 1  | <0.001 | 0.939  | 0.918        | 0.961  |
| Indigenous peoples                        | -1.099 | 0.096 | 130.515   | 1  | <0.001 | 0.333  | 0.276        | 0.402  |
| Educational level                         |        |       |           |    |        |        |              |        |
| Illiterate                                | 0.782  | 0.026 | 899.149   | 1  | <0.001 | 2.186  | 2.077        | 2.301  |
| 1 <sup>st</sup> fundamental cycle         | 0.620  | 0.019 | 1,012.349 | 1  | <0.001 | 1.858  | 1.788        | 1.930  |
| 2 <sup>nd</sup> fundamental cycle         | 0.473  | 0.020 | 543.038   | 1  | <0.001 | 1.605  | 1.543        | 1.671  |
| High school                               | 0.220  | 0.019 | 135.261   | 1  | <0.001 | 1.246  | 1.201        | 1.294  |
| University education                      |        |       | 1,539.346 | 5  | <0.001 |        |              |        |
| Not applicable                            | 0.766  | 0.059 | 166.155   | 1  | <0.001 | 2.151  | 1.915        | 2.417  |
| Place of residence                        |        |       |           |    |        |        |              |        |
| Urban                                     |        |       | 101.672   | 2  | <0.001 |        |              |        |
| Rural                                     | 0.228  | 0.023 | 100.430   | 1  | <0.001 | 1.257  | 1.202        | 1.314  |
| Peri-urban                                | 0.118  | 0.092 | 1.646     | 1  | 0.200  | 1.126  | 0.939        | 1.349  |
| Living in a Flu outbreak region           | -0.348 | 0.013 | 707.729   | 1  | <0.001 | 0.706  | 0.688        | 0.724  |
| Received Flu vaccine                      | -0.071 | 0.011 | 39.241    | 1  | <0.001 | 0.931  | 0.911        | 0.952  |
| Used antiviral drugs to treat the disease | 0.319  | 0.013 | 593.516   | 1  | <0.001 | 1.376  | 1.341        | 1.412  |
| Need for intensive care unit              | -0.129 | 0.013 | 97.287    | 1  | <0.001 | 0.879  | 0.857        | .902   |
| Closure criterion                         |        |       |           |    |        |        |              |        |
| Laboratorial criterion                    |        |       | 2,513.542 | 3  | <0.001 |        |              |        |
| Clinical - Epidemiological                | 0.244  | 0.059 | 16.844    | 1  | <0.001 | 1.277  | 1.136        | 1.434  |
| Clinical                                  | 1.460  | 0.037 | 1,520.265 | 1  | <0.001 | 4.307  | 4.002        | 4.635  |
| Clinical - Image exams                    | -2.224 | 0.072 | 953.408   | 1  | <0.001 | 0.108  | 0.094        | 0.125  |
| Outcome                                   |        |       |           |    |        |        |              |        |
| Clinical cure                             |        |       | 5,000.591 | 2  | <0.001 |        |              |        |
| Death                                     | -0.809 | 0.015 | 3,073.824 | 1  | <0.001 | 0.445  | 0.433        | 0.458  |
| Death not related to SARI                 | 2.664  | 0.067 | 1,602.313 | 1  | <0.001 | 14.350 | 12.595       | 16.349 |
| Constant                                  | -1.083 | 0.018 | 3,463.752 | 1  | <0.001 | 0.339  |              |        |

**Model 2.** Included social and demographic data <sup>b</sup>

|              |        |       |           |   |        |       |       |       |
|--------------|--------|-------|-----------|---|--------|-------|-------|-------|
| Sex (female) | 0.122  | 0.009 | 189.344   | 1 | <0.001 | 1.130 | 1.110 | 1.150 |
| Age          |        |       |           |   |        |       |       |       |
| <1 y.o.      | 1.887  | 0.063 | 890.149   | 1 | <0.001 | 6.603 | 5.833 | 7.474 |
| 1-12 y.o.    | 2.052  | 0.035 | 3,433.696 | 1 | <0.001 | 7.782 | 7.265 | 8.334 |
| 13-24 y.o.   | 1.051  | 0.023 | 2,107.818 | 1 | <0.001 | 2.861 | 2.736 | 2.993 |
| 25-60 y.o.   |        |       | 6,185.885 | 6 | <0.001 |       |       |       |
| 61-72 y.o.   | -0.114 | 0.012 | 87.579    | 1 | <0.001 | 0.893 | 0.872 | 0.914 |
| 73-85 y.o.   | 0.099  | 0.014 | 53.973    | 1 | <0.001 | 1.104 | 1.076 | 1.134 |
| +85 y.o.     | 0.363  | 0.018 | 392.040   | 1 | <0.001 | 1.438 | 1.387 | 1.490 |
| Race         |        |       |           |   |        |       |       |       |
| White        |        |       | 327.497   | 4 | <0.001 |       |       |       |
| Black        | 0.197  | 0.019 | 112.217   | 1 | <0.001 | 1.218 | 1.175 | 1.264 |
| Asian        | -0.021 | 0.043 | 0.244     | 1 | 0.622  | 0.979 | 0.900 | 1.065 |

|                                           |        |       |           |   |        |       |       |       |
|-------------------------------------------|--------|-------|-----------|---|--------|-------|-------|-------|
| Individuals from a multiracial background | -0.046 | 0.010 | 23.103    | 1 | <0.001 | 0.955 | 0.937 | 0.973 |
| Indigenous peoples                        | -0.999 | 0.077 | 166.739   | 1 | <0.001 | 0.368 | 0.317 | 0.429 |
| Educational level                         |        |       |           |   |        |       |       |       |
| Illiterate                                | 0.702  | 0.021 | 1,068.117 | 1 | <0.001 | 2.018 | 1.935 | 2.104 |
| 1 <sup>st</sup> fundamental cycle         | 0.535  | 0.016 | 1,112.116 | 1 | <0.001 | 1.707 | 1.654 | 1.761 |
| 2 <sup>nd</sup> fundamental cycle         | 0.355  | 0.017 | 444.590   | 1 | <0.001 | 1.426 | 1.380 | 1.474 |
| High school                               | 0.155  | 0.016 | 99.505    | 1 | <0.001 | 1.167 | 1.132 | 1.204 |
| University education                      |        |       | 1,837.026 | 5 | <0.001 |       |       |       |
| Not applicable                            | 0.768  | 0.051 | 224.857   | 1 | <0.001 | 2.156 | 1.950 | 2.384 |
| Place of residence                        |        |       |           |   |        |       |       |       |
| Urban                                     |        |       | 169.650   | 2 | <0.001 |       |       |       |
| Rural                                     | 0.239  | 0.018 | 168.212   | 1 | <0.001 | 1.270 | 1.225 | 1.317 |
| Peri-urban                                | 0.110  | 0.077 | 2.017     | 1 | 0.156  | 1.116 | 0.959 | 1.298 |
| Living in a Flu outbreak region           | -0.282 | 0.011 | 709.876   | 1 | <0.001 | 0.755 | 0.739 | 0.770 |
| Received Flu vaccine                      | 0.021  | 0.010 | 4.827     | 1 | 0.028  | 1.021 | 1.002 | 1.040 |
| Constant                                  | -0.917 | 0.015 | 3,825.354 | 1 | <0.001 | 0.400 |       |       |

df, degrees of freedom; SE, standard error; OR, odds ratio; 95%CI, 95% confidence interval; y.o., years old. We adopted an alpha error of 0.05.

<sup>a</sup>, we included the following patient's features in the statistical analysis: sex, age, race, educational level, place of residence, residence in a Flu outbreak region, Flu vaccine status during the last vaccination campaign, treatment for SARI symptoms with an antiviral drug, need for intensive care unit, closure criteria, and outcome.

<sup>b</sup>, we included the following patient's features in the statistical analysis: sex, age, race, educational level, place of residence, residence in a Flu outbreak region, and Flu vaccine status during the last vaccination campaign.

**Supplementary Table 5.** Multivariate analysis using the binary logistic regression compares patients with severe acute respiratory infection (SARI) due to an undefined etiological agent versus patients with other causes of SARI <sup>a</sup>.

**Model 1.** Included social and demographic data as well as hospitalization information <sup>b</sup>

| Patient's features                        | B                                         | SE     | Wald    | df        | P      | OR     | 95%CI for OR |        |        |
|-------------------------------------------|-------------------------------------------|--------|---------|-----------|--------|--------|--------------|--------|--------|
|                                           |                                           |        |         |           |        |        | Lower        | Upper  |        |
| Sex (female)                              | 0.106                                     | 0.010  | 102.727 | 1         | <0.001 | 1.112  | 1.089        | 1.135  |        |
| Age                                       |                                           |        |         |           |        |        |              |        |        |
|                                           | <1 y.o.                                   | 1.634  | 0.060   | 748.398   | 1      | <0.001 | 5.123        | 4.557  | 5.759  |
|                                           | 1-12 y.o.                                 | 1.881  | 0.036   | 2,694.253 | 1      | <0.001 | 6.563        | 6.113  | 7.046  |
|                                           | 13-24 y.o.                                | 1.224  | 0.028   | 1,943.126 | 1      | <0.001 | 3.401        | 3.221  | 3.591  |
|                                           | 25-60 y.o.                                |        |         | 5,380.647 | 6      | <0.001 |              |        |        |
|                                           | 61-72 y.o.                                | 0.026  | 0.015   | 3.277     | 1      | 0.070  | 1.027        | 0.998  | 1.056  |
|                                           | 73-85 y.o.                                | 0.361  | 0.016   | 492.054   | 1      | <0.001 | 1.435        | 1.390  | 1.481  |
|                                           | +85 y.o.                                  | 0.728  | 0.022   | 1,097.236 | 1      | <0.001 | 2.070        | 1.983  | 2.161  |
| Race                                      |                                           |        |         |           |        |        |              |        |        |
|                                           | White                                     |        |         | 249.460   | 4      | <0.001 |              |        |        |
|                                           | Black                                     | 0.202  | 0.022   | 83.437    | 1      | <0.001 | 1.223        | 1.172  | 1.277  |
|                                           | Asian                                     | 0.009  | 0.053   | 0.031     | 1      | 0.861  | 1.009        | 0.910  | 1.119  |
|                                           | Individuals from a multiracial background | -0.064 | 0.012   | 30.481    | 1      | <0.001 | 0.938        | 0.917  | 0.960  |
|                                           | Indigenous peoples                        | -0.988 | 0.093   | 114.067   | 1      | <0.001 | 0.372        | 0.310  | 0.446  |
| Educational level                         |                                           |        |         |           |        |        |              |        |        |
|                                           | Illiterate                                | 0.771  | 0.026   | 890.418   | 1      | <0.001 | 2.161        | 2.054  | 2.273  |
|                                           | 1 <sup>st</sup> fundamental cycle         | 0.618  | 0.019   | 1,015.121 | 1      | <0.001 | 1.855        | 1.786  | 1.927  |
|                                           | 2 <sup>nd</sup> fundamental cycle         | 0.474  | 0.020   | 548.598   | 1      | <0.001 | 1.606        | 1.544  | 1.671  |
|                                           | High school                               | 0.224  | 0.019   | 141.350   | 1      | <0.001 | 1.252        | 1.206  | 1.299  |
|                                           | University education                      |        |         | 1,529.720 | 5      | <0.001 |              |        |        |
|                                           | Not applicable                            | 0.507  | 0.050   | 101.129   | 1      | <0.001 | 1.660        | 1.504  | 1.833  |
| Place of residence                        |                                           |        |         |           |        |        |              |        |        |
|                                           | Urban                                     |        |         | 108.719   | 2      | <0.001 |              |        |        |
|                                           | Rural                                     | 0.232  | 0.022   | 106.649   | 1      | <0.001 | 1.261        | 1.207  | 1.318  |
|                                           | Peri-urban                                | 0.144  | 0.089   | 2.612     | 1      | 0.106  | 1.155        | 0.970  | 1.374  |
| Living in a Flu outbreak region           |                                           | -0.329 | 0.013   | 648.216   | 1      | <0.001 | 0.720        | 0.702  | 0.738  |
| Received Flu vaccine                      |                                           | -0.065 | 0.011   | 33.461    | 1      | <0.001 | 0.937        | 0.917  | 0.958  |
| Used antiviral drugs to treat the disease |                                           | 0.272  | 0.013   | 443.500   | 1      | <0.001 | 1.312        | 1.280  | 1.346  |
| Need for intensive care unit              |                                           | -0.133 | 0.013   | 106.311   | 1      | <0.001 | 0.875        | 0.853  | 0.898  |
| Closure criterion                         |                                           |        |         |           |        |        |              |        |        |
|                                           | Laboratorial criterion                    |        |         | 2,537.194 | 3      | <0.001 |              |        |        |
|                                           | Clinical - Epidemiological                | 0.268  | 0.059   | 20.784    | 1      | <0.001 | 1.307        | 1.165  | 1.467  |
|                                           | Clinical                                  | 1.447  | 0.037   | 1,549.414 | 1      | <0.001 | 4.252        | 3.956  | 4.570  |
|                                           | Clinical - Image exams                    | -2.193 | 0.071   | 944.014   | 1      | <0.001 | 0.112        | 0.097  | 0.128  |
| Outcome                                   |                                           |        |         |           |        |        |              |        |        |
|                                           | Clinical cure                             |        |         | 4,979.857 | 2      | <0.001 |              |        |        |
|                                           | Death                                     | -0.795 | 0.015   | 2,999.701 | 1      | <0.001 | 0.452        | 0.439  | 0.465  |
|                                           | Death not related to SARI                 | 2.529  | 0.063   | 1,635.904 | 1      | <0.001 | 12.546       | 11.099 | 14.182 |
| Constant                                  |                                           | -1.089 | 0.018   | 3,539.966 | 1      | <0.001 | 0.336        |        |        |

**Model 2.** Included social and demographic data <sup>c</sup>

|              |            |        |         |           |        |        |       |       |       |
|--------------|------------|--------|---------|-----------|--------|--------|-------|-------|-------|
| Sex (female) | 0.119      | 0.009  | 183.068 | 1         | <0.001 | 1.126  | 1.107 | 1.146 |       |
| Age          |            |        |         |           |        |        |       |       |       |
|              | <1 y.o.    | 1.562  | 0.053   | 863.926   | 1      | <0.001 | 4.766 | 4.295 | 5.289 |
|              | 1-12 y.o.  | 1.793  | 0.032   | 3,220.466 | 1      | <0.001 | 6.007 | 5.646 | 6.390 |
|              | 13-24 y.o. | 1.020  | 0.023   | 2,027.642 | 1      | <0.001 | 2.773 | 2.652 | 2.899 |
|              | 25-60 y.o. |        |         | 5,861.376 | 6      | <0.001 |       |       |       |
|              | 61-72 y.o. | -0.109 | 0.012   | 81.596    | 1      | <0.001 | 0.896 | 0.875 | 0.918 |
|              | 73-85 y.o. | 0.103  | 0.013   | 58.835    | 1      | <0.001 | 1.109 | 1.080 | 1.139 |
|              | +85 y.o.   | 0.363  | 0.018   | 395.729   | 1      | <0.001 | 1.438 | 1.388 | 1.491 |
| Race         |            |        |         |           |        |        |       |       |       |
|              | White      |        |         | 306.008   | 4      | <0.001 |       |       |       |
|              | Black      | 0.196  | 0.018   | 112.900   | 1      | <0.001 | 1.217 | 1.174 | 1.262 |
|              | Asian      | -0.020 | 0.043   | 0.218     | 1      | 0.640  | 0.980 | 0.901 | 1.066 |



|                                           |        |       |           |   |        |       |       |       |
|-------------------------------------------|--------|-------|-----------|---|--------|-------|-------|-------|
| Individuals from a multiracial background | -0.044 | 0.010 | 20.868    | 1 | <0.001 | 0.957 | 0.940 | 0.975 |
| Indigenous peoples                        | -0.908 | 0.075 | 147.422   | 1 | <0.001 | 0.403 | 0.348 | 0.467 |
| Educational level                         |        |       |           |   |        |       |       |       |
| Illiterate                                | 0.692  | 0.021 | 1,052.636 | 1 | <0.001 | 1.997 | 1.915 | 2.082 |
| 1 <sup>st</sup> fundamental cycle         | 0.532  | 0.016 | 1,105.440 | 1 | <0.001 | 1.702 | 1.649 | 1.756 |
| 2 <sup>nd</sup> fundamental cycle         | 0.354  | 0.017 | 445.223   | 1 | <0.001 | 1.425 | 1.379 | 1.473 |
| High school                               | 0.157  | 0.015 | 103.124   | 1 | <0.001 | 1.170 | 1.135 | 1.206 |
| University education                      |        |       | 1,792.379 | 5 | <0.001 |       |       |       |
| Not applicable                            | 0.512  | 0.044 | 133.933   | 1 | <0.001 | 1.669 | 1.530 | 1.820 |
| Place of residence                        |        |       |           |   |        |       |       |       |
| Urban                                     |        |       | 179.807   | 2 | <0.001 |       |       |       |
| Rural                                     | 0.243  | 0.018 | 177.879   | 1 | <0.001 | 1.276 | 1.231 | 1.322 |
| Peri-urban                                | 0.122  | 0.075 | 2.621     | 1 | 0.105  | 1.130 | 0.975 | 1.309 |
| Living in a Flu outbreak region           | -0.267 | 0.010 | 651.564   | 1 | <0.001 | 0.766 | 0.750 | 0.781 |
| Received Flu vaccine                      | 0.022  | 0.009 | 5.626     | 1 | 0.018  | 1.023 | 1.004 | 1.042 |
| Constant                                  | -0.931 | 0.015 | 3,969.279 | 1 | <0.001 | 0.394 |       |       |

df, degrees of freedom; SE, standard error; Sig, statistical significance (P-value); OR, odds ratio; 95%CI, 95% confidence interval; y.o., years old. We adopted an alpha error of 0.05.

<sup>a</sup>, others included SARI due to Influenza, SARI due to another respiratory infection, SARI due to another known etiological agent, SARI due to COVID-19 (SARS-CoV-2).

<sup>b</sup>, we included the following patient's features in the statistical analysis: sex, age, race, educational level, place of residence, residence in a Flu outbreak region, Flu vaccine status during the last vaccination campaign, treatment for SARI symptoms with an antiviral drug, need for intensive care unit, closure criteria, and outcome.

<sup>c</sup>, we included the following patient's features in the statistical analysis: sex, age, race, educational level, place of residence, residence in a Flu outbreak region, and Flu vaccine status during the last vaccination campaign.
